# Supplementary material for: Graphene versus Multi-Walled Carbon Nanotubes for Electrochemical Glucose Biosensing
Source: MDPI journal article supplement (doi:10.3390/ma6031011), 2013-03-14

## Supporting Information

**Figure S1.** Raman spectra of bare (red) and APTES-functionalized (blue) (a) graphene and (b) MWCNTs.

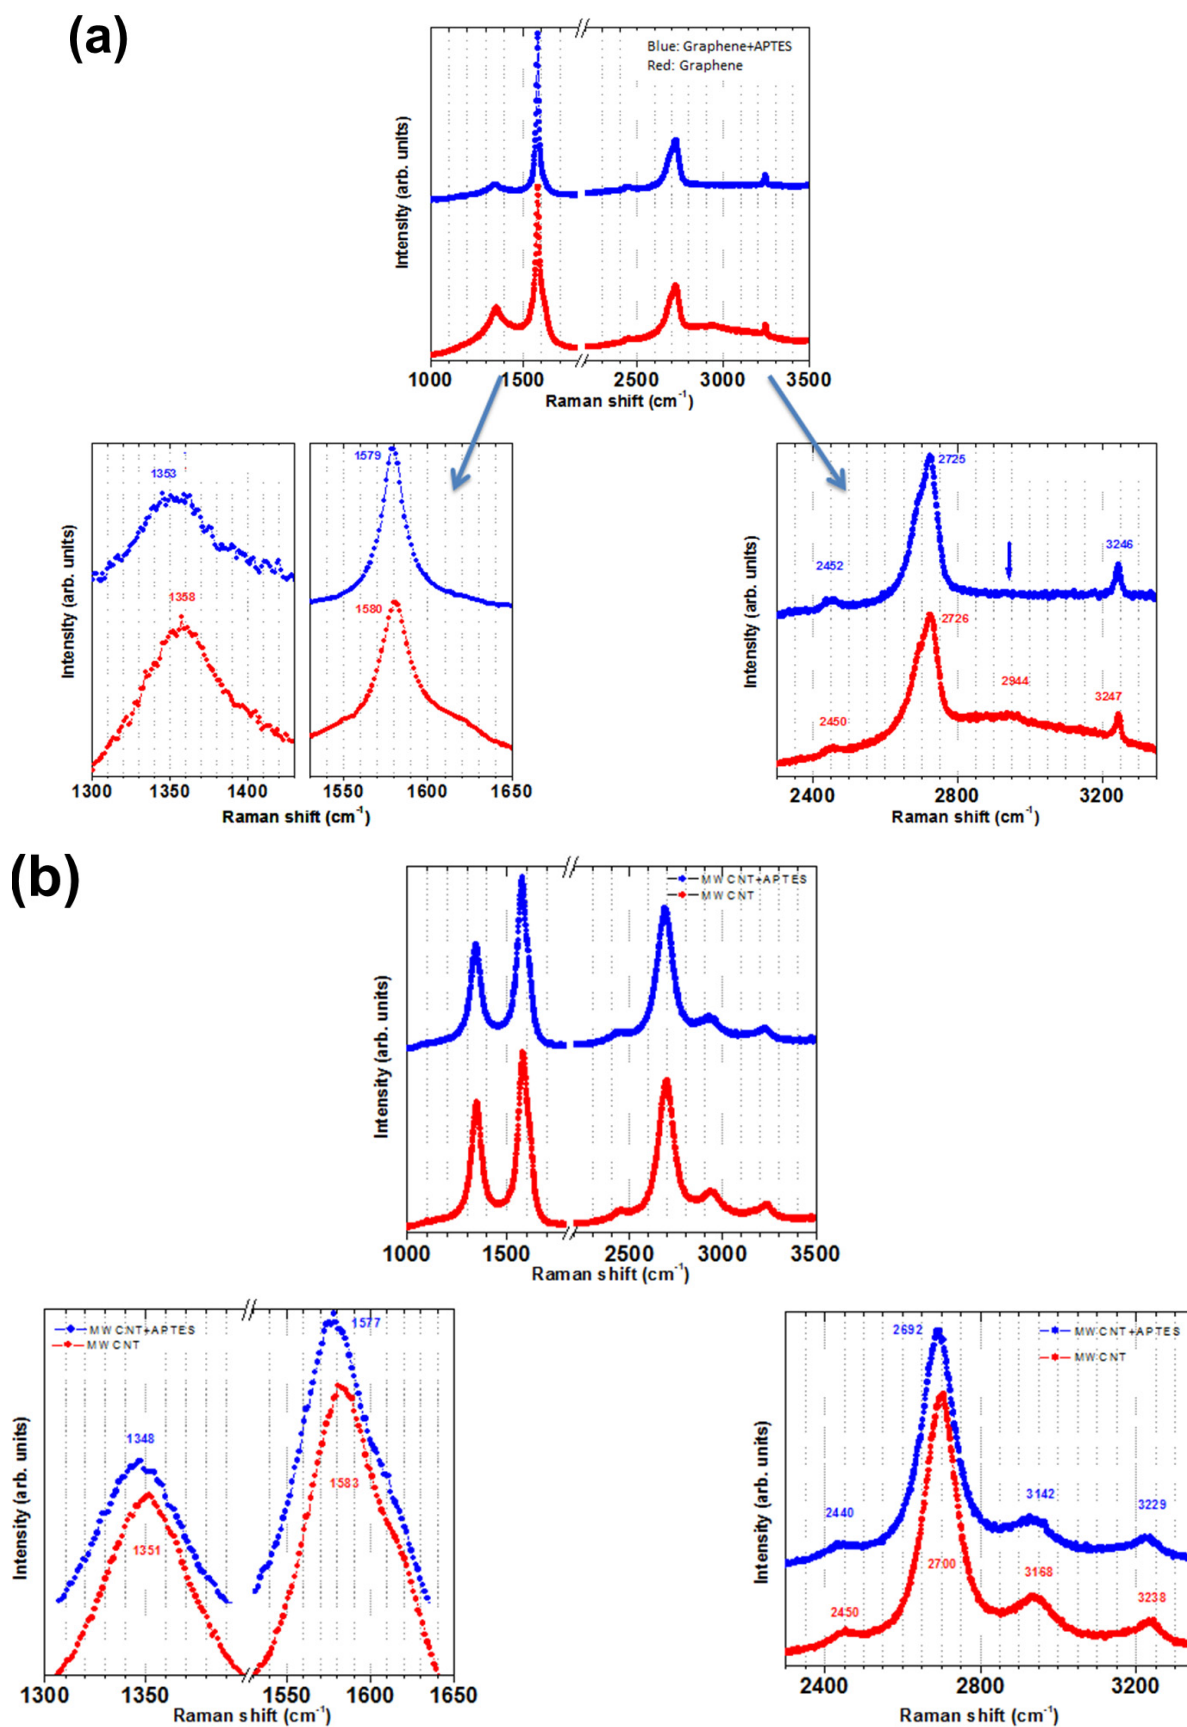

**Figure S2.** The FTIR spectrum of (a) the KOH-treated GCE modified with APTES and MWCNTs dispersed in dimethylformamide (DMF); (b) the KOH-treated GCE modified with MWCNTs dispersed in APTES; (c) same as (b) followed by conjugation with GOx.

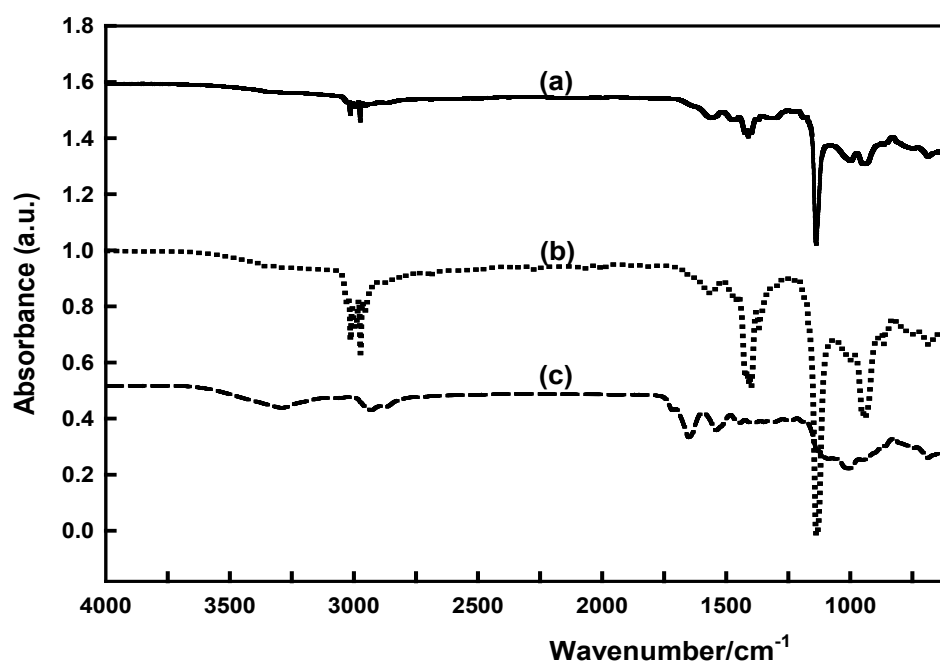

**Figure S3.** The FTIR spectrum of (a) the KOH-treated GCE modified with “layered by layered” APTES and graphene dispersed in DMF; (b) the KOH-treated GCE modified with graphene dispersed in APTES; and (c) same as (b) followed by conjugation with GOx.

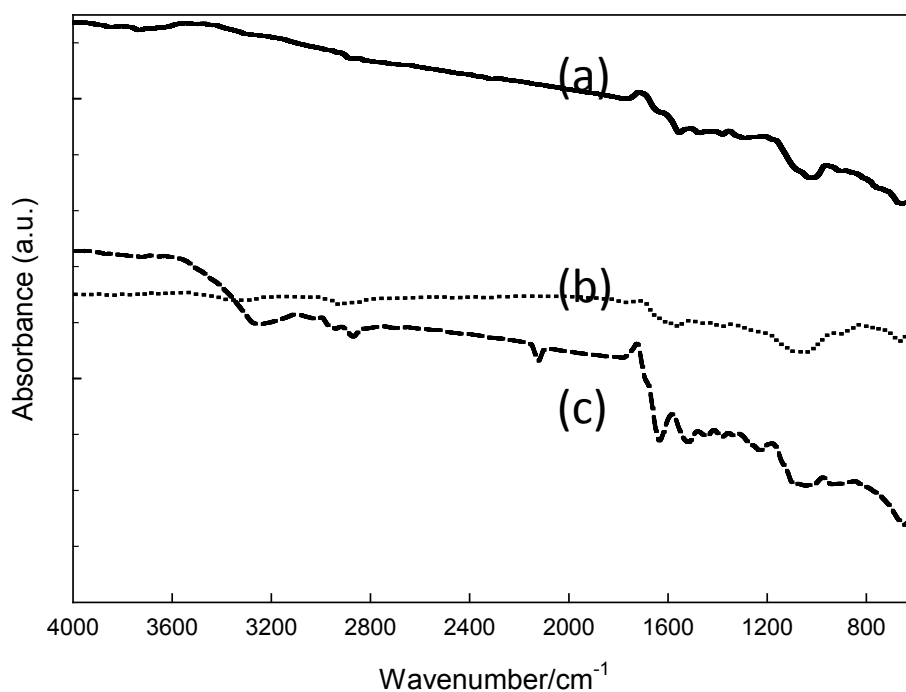

**Figure S4.** CVs of graphene- (a) and MWCNT-functionalized (b) GCE at different scan rates in 5 mM  $\text{Fe}(\text{CN})_6^{3-}$  (0.5 M KCl). Scan rate: 20–200  $\text{mV s}^{-1}$ . Inlet: linear relationship between  $i_p$  and  $v^{1/2}$ .

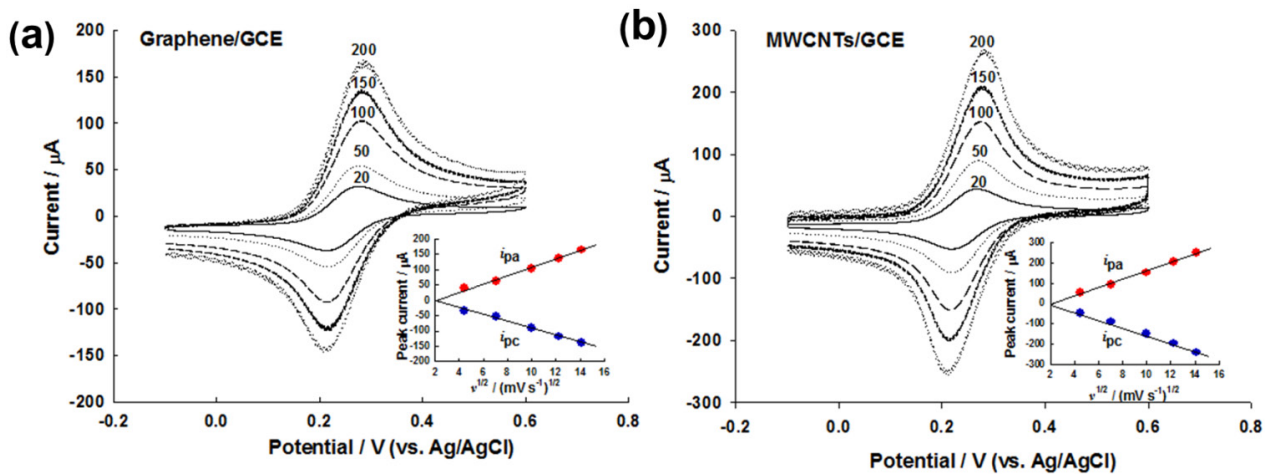

**Figure S5.** Optimization of the applied potential for the electrochemical detection of 4 mM glucose by Nafion/MWCNT-GOx/GCE.

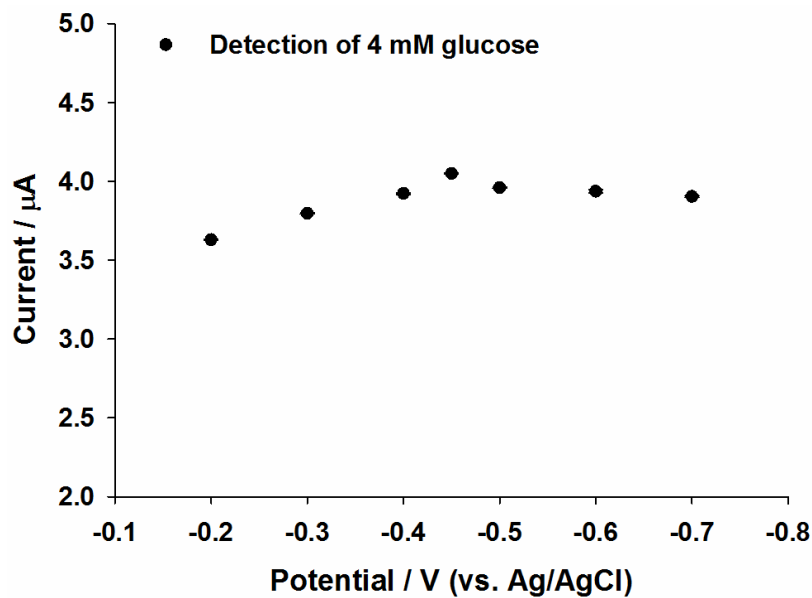

Supplement: s1 [file s1]
